# Supplementary material for: Can the Pinus sylvestris var. mongolica sand-fixing forest develop sustainably in a semi-arid region?
Source: Copernicus journal article supplement (doi:10.5194/hess-2019-110), 2019-03-18
Supplement: Supplementary file [file hess-2019-110-AC4-supplement.pdf]

# On the soil moisture dynamics of sand-fixing *Pinus sylvestris* var. *mongolica* forest in a semi-arid region

Yiben Cheng<sup>1,2</sup>, Hongbin Zhan<sup>3</sup>, Mingchang Shi<sup>1</sup>

<sup>1</sup>School of soil and water conservation, Beijing Forestry University, Beijing, China, 100083

5 <sup>2</sup>Forest Ecosystem Studies, National Observation and Research Station, Jixian, Shanxi, China, 042200

<sup>3</sup>Department of Geophysical, Texas A&M University in College Station, Texas, USA, 77840

*Correspondence to:* Yiben Cheng (chengyiben07@gmail.com)

10 **Abstract:** Land degradation is a global environmental and societal concern at present, and China is one of the countries that face the most severe damage of land degradation (desertification). China's so-called Three North shelterbelt Program (3NSP) has produced a vast area of lined forest in the semi-arid regions with the purpose of battling land degradation. To understand the water balance and sustainable development of artificial forest in semi-arid region, this study uses the 30-year-old lined rain-fed *Pinus sylvestris* var. *mongolica* sand-fixing forest in the eastern part of Mu

15 Us Sandy land in Northwestern China as an example. Rain gauge, newly designed lysimeter and soil moisture sensor are used to monitor precipitation, deep soil recharge (DSR) and soil water content, resulting in an accurate estimation of annual moisture distribution of the rain-feed *Pinus sylvestris* var. *mongolica*. The study shows that there are two obvious moisture recharge processes in an annual base for the *Pinus sylvestris* var. *mongolica* forest soil in high latitude Sandy land: 1) the snow melted water infiltration-recharge process in the spring, and 2) the precipitation-

20 recharge process in the summer. The recharge depth of the first process can reach 180 cm, 2018. The second process results in DSR (referring to recharge that can reach a depth more than 200 cm and may eventually replenish the groundwater reservoir). The DSR of 2016-2018 is 1.4 mm, 0.2mm, 1.2 mm, respectively. To reach the recharge depths of 20 cm, 40 cm, 80 cm, 120 cm, 160 cm, and 200 cm, the corresponding precipitation intensities have to be 2.6 mm/d, 3.2 mm/d, 3.4 mm/d, 8.2 mm/d, 8.2 mm/d, and 13.2 mm/d, respectively. The annual evaporation amount in the Mu

25 Us Sandyland *Pinus sylvestris* var. *mongolica* forest is 426.96 mm in 2016, 324.6 mm in 2017, 416.253 mm in 2018. This study concludes that under the current precipitation conditions (dry- and wet- year, 2016-2018), very small but observable DSR happened, thus the groundwater system underneath the forest may be replenished. This study confirms that developing limited amount forestry in semi-arid regions is likely in a sustainable fashion. The widely variable annual precipitation in semi-arid areas may affect this conclusion and should be investigated in the future.

30 **Keywords:** Rain-fed *Pinus sylvestris* var. *Mongolia*, Infiltration, Semi-arid region, DSR, Soil moisture

## 1 Introduction

Land degradation (Reynolds et al., 2007) is a global threat that impacts heavily on the livelihoods of millions of people inside and outside the desert land (Yang et al., 2005). The true cost of land degradation is frequently underestimated due to the unknown scale of these external and downstream impacts (Cao et al., 2011). Sand and dust storms happen when strong winds impact the arid and semi-arid regions (Sun et al., 2015; Wang et al., 2010a). Sandstorms occur relatively close to the ground and can rise to kilometers high into the atmosphere and transport very long distances (Wu et al., 2013). Sandstorms impact human health, agriculture and transport (Wang et al., 2013). Agroforestry is a proven approach to battle land degradation or even eradicate sandstorms in some areas, but agroforestry taxes heavily on water resources in arid and semi-arid regions, which may cause other unwanted environmental problems (García Chevesich et al., 2017). Soil moisture is a vital component in the ecological environment and is the source of life for plants on the earth surface (Sharma and Sharma, 2005). On the land surface of the Earth, not only the natural vegetation distribution is limited by water supply, but also the production of artificial vegetation relies on water supply more than any other factors (Gerten et al., 2004; Contreras et al., 2011). Therefore, the dynamic relations among soil, vegetation and soil moisture and the study on their regulation mechanism are of great concern in various disciplines like forestry, agriculture, livestock, and environment (Young, 1989; Li et al., 2013b). For instance, the research in this field in China in the past decade has deeply influenced the economic development strategies of arid and semi-arid regions (Cao et al., 2011), and lessons learnt can be applicable for management of arid and semi-arid regions in other parts of the World as well.

Semi-arid regions are transitional zones between arid-regions and humid-regions, and are also active areas where land degradation takes place (Gong et al., 2004; Rhee et al., 2010). A semi-arid region generally refers to an area with a drought index (annual evaporation/annual precipitation) between 1.5 and 3.49. A region with less than 200 mm annual precipitation is often designated as an arid region (Su et al., 2007). A region with an annual precipitation between 200 mm and 500 mm is designated as a semi-arid region (Barton et al., 2008). The total arid and semi-arid area of the world is approximately 48 million km<sup>2</sup>, which is a third of the entire continental area of the World, covering more than 50 counties and regions (Gao et al., 2014a). The vast arid, semi-arid, and semi-humid and drought-prone areas, are the birthplace of the world's ancient civilizations, and have an important place in the modern farming and livestock production industries (Ngigi et al., 2005). In the United States alone, 17 states in the West, which are mainly of arid and semi-arid climate, provide more than 80% of the farming and livestock products for the country (Powell et al., 1879). The former U.S.S.R. Central Asian arid and semi-arid regions provide 45% of the total commodity food for the former U.S.S.R (Bouwman et al., 2005; Kraemer et al., 2015). The farming and livestock products from the Central and Western Australian arid and semi-arid regions play an important role in the world market as well (Fagg and Stewart, 1994).

*Pinus sylvestris* var. *mongolica* is a geographical variant of European red pine in the Far East (Bao, 2015; Li et al., 2004). It is naturally distributed in large areas of China's humid and semi-humid areas, especially Daxinganling in the northeast. It inherits the original European red pine's adaptive ability to a variety of ecological environments, and has characteristics such as heliophile, drought-resistant, cold-resistant, soil infertility-resistant and is more resilient to

water shortage. It is one of the most common species used in 3NSP (Zhu et al., 2006). Since the start of 3NSP in 1978, *Pinus sylvestris* var. *mongolica* has been introduced and planted on a large scale in the windy and sandy areas in the Northeast, Northwest, and North China (Runnström, 2000) and this is why we choose it as an example to study. Up to present, it has been applied in more than 300 counties across 13 provinces, municipalities and autonomous regions, with a total area over  $3 \times 10^5$  hm<sup>2</sup> (Hu et al., 2008). Studies have shown that China has made great achievements in sand prevention and control. China and India have contributed one-third of the world's new vegetation coverage. 42% of China's new vegetation coverage area is forest, and 32% is agricultural land. The expansion of green areas in India is mainly due to the expansion of agricultural land (82%), and the contribution of forests is smaller than that in China (4.4%) (Bawa et al., 2010; Menon et al., 2002). However, even with such an extraordinary achievement, there are still grave concerns in managing windbreak and sand-fixation rain-fed forests (Wang et al., 2010a; Cao et al., 2011; Wang et al., 2010b). For example, reforestation is not successful in some places with unclear reasons. Specifically, trees grow into dwarf trees, which are ineffective in battling land degradation, or even die.

Now the question becomes: Is there enough water resource for the reforestation of *Pinus sylvestris* var. *mongolica* in battling land degradation in semi-arid regions of China? Or on the soil moisture dynamics of sand-fixing *Pinus sylvestris* var. *mongolica* forest in a semi-arid region. We will try to answer this question from a hydrological point of view by inspecting the relationship of precipitation, soil moisture change, and deep soil recharge (DSR) (referring to recharge that can reach a depth more than 200 cm and may eventually replenish the groundwater reservoir). In particular, if a sizable DSR can occur, meaning that groundwater may be recharged from precipitation, or there will be no dry soil layer below the root system layer in this region (Burgess et al., 1998; Bouma and Dekker, 1978). The sustainable reforestation in the region is possible, meaning that: 1) the precipitation amount meets the growth needs of *Pinus sylvestris* var. *mongolica*, and 2) the system still has excess amount of water to replenish deep soil layer as a sustainable standard. To accomplish this goal, this study uses a newly developed DSR lysimeter to monitor a 30-year old pine artificial forest in the Northwest China. The collected dataset is used to understand the soil moisture dynamic and the DSR of the *Pinus sylvestris* var. *mongolica* in sandy land. Specifically, we try to tackle the following issues: 1) Sources of soil water recharge in semi-arid areas, especially the source of deep soil layer moisture; 2) The precipitation density that causes infiltration and its maximal penetrating depth; 3) The rate of annual precipitation infiltration; 4) The evaporation amount of the pine forestry land. The ultimate goal is to find out whether the rain-feed *Pinus sylvestris* var. *mongolica* sand-fixing forest can develop sustainably or not in the study site.

## 2 Material and Method

### 2.1 Overview of the study area

The area under study is located in Chagan Naoer, on the northeastern edge of Mu Us Sandy land (39°05'16.2"N, 109°36'04"E), as shown in Figure 1. Mu Us Sandy land mainly consists of semi-fixed and fixed sand dunes, adjacent with the Loess Plateau, located in a desert-loess transitional zone. It has northwestern wind in the winter with a typically dry winter climate and frequent sandstorm. It has southeastern monsoon in the summer. The summer climate is relatively humid, and it is easy to form local heavy precipitation. The multi-year average precipitation is 400 mm,

105 mostly concentrated during the summer. The groundwater table depth varies between 2 m to 17 m in Mu Us Sandyland, and it is 8 m at the experimental area of this study (Runnström, 2003). The groundwater table is lower in the summer and higher in the spring, with a variation less than 1.5 m. Since the initiation of 3NSP at Mu Us Sandy land in 1989, *Pinus sylvestris* var. *mongolica* has been planted in lines in the experimental area, with a 10 m line spacing, an average plant height of 6 m, and an average crown diameter of 6.6 m. The seasonal frozen soil period in the experimental area is from January to April, and from November to December in an annual base (Li et al., 2013a). The soil type in this area is sandy soil, the particle size distribution of 0-200 cm depth is as follows: extra coarse sand of 0.00%, coarse sand of 3.23%, middle sand of 50.53%, fine sand of 36.06%, very fine sand of 7.19%, and silt sand of 2.99%.

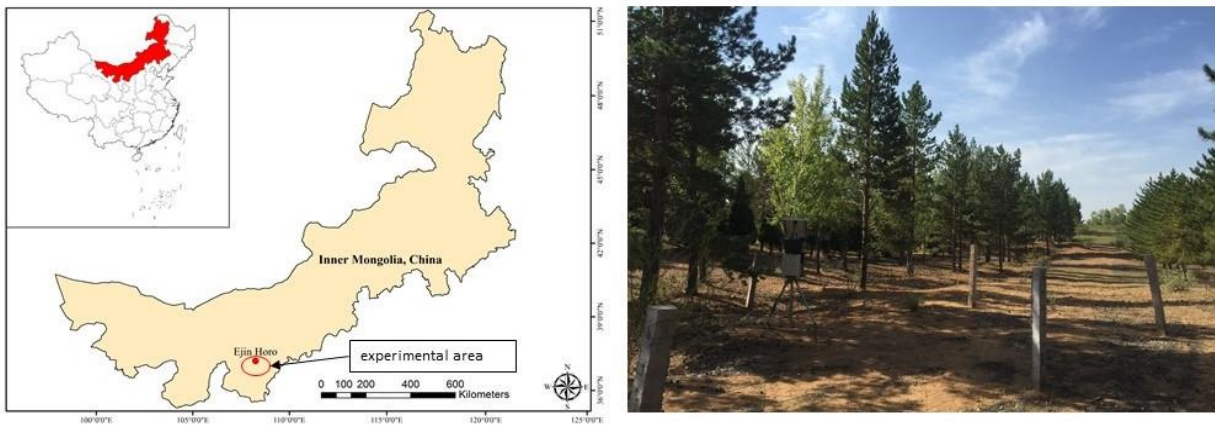

Figure 1. Geographic location of the experimental area and study site.

## 2.2 Experimental design

115 Root analysis of *Pinus sylvestris* var. *mongolica* shows that it has a shallow root distribution and underdeveloped main root, which belongs to a typical lateral root type. The 30-year-old *Pinus sylvestris* var. *mongolica*'s root distribution can reach 6.5 m, with a concentrated area of 2.5 m. In this study site, the ground water level is too deep to supply for roots, so *Pinus sylvestris* var. *mongolica* root is mostly distributed over a vertical range of 0-0.5m and relies on precipitation for water supply. The original main root usually stops growing at 1.5-2 m depth (Zhu et al., 2006). Therefore, in the experimental design of this study, the lowest soil moisture sensor is placed at a depth of 200 cm, and the lysimeter placement is also at the 200 cm depth. The canopy of *Pinus sylvestris* var. *mongolica* is capable of intercepting precipitation, thus affects the measurements of precipitation and soil moisture directly underneath the canopy (Roth et al., 2007). Therefore, the measurements of this study are made in the middle between the forest lines, without the interference of canopy.

### 2.2.1 Soil moisture monitoring

125 Based on the root depth of *Pinus sylvestris* var. *mongolica*, the depth range of soil moisture sensor placement is determined. A soil section is cut out in the middle between two forest lines. The section consists of a layer of dead

tree leaves, a leached layer, a depositional layer, and a native soil layer, which is of fine sand. Soil moisture sensors (EC-5, accuracy 0.1% mm, USA) are placed in soil layers at 20 cm, 40 cm, 80 cm, 120 cm, 160 cm, and 200 cm depths. The measurement interval is one hour. The EC-5 soil moisture probes are used and the correction equation is (Wu et al., 2014):

$$y_{\text{Sandy}} = 1.0223x_{\text{Sandy}} - 0.0302 \quad (R^2 = 0.9098) \quad (1)$$

where  $x_{\text{sand}}$  and  $y_{\text{sand}}$  are analog value and standard value, respectively. The topographic variation of the area is almost negligible and long-term observations show that there is no surface runoff. Under low temperature conditions in the winter, the accuracy of soil moisture sensor (EC-5) may drop by 5% (according to the original manufacturer's instruction). To avoid the possibly unreliable data in the winter, this research focuses on analyzing the data from April to November (unfrozen ground period).

### 2.2.2 DSR monitoring

To study the moisture distribution of *Pinus sylvestris* var. *mongolica* in Mu Us Sandy land, two sets of data need to be collected: precipitation from a rain gauge, and DSR measurement from a lysimeter. This new lysimeter has a few innovations (see Figure 2) that can be outlined as follows. Instead of setting the upper boundary of the lysimeter at ground surface, the new design has its upper boundary at a designed depth (denoted as depth-A) where infiltration will be measured. A cylindrical container with a diameter of 20 cm to 40 cm with impermeable walls is installed from depth-A downward to a deeper depth-B. The length of AB is determined according to the capillary rise of the in-situ soil, which can be calculated using the average grain size of soils within AB. More specifically, the length of AB is greater than the capillary rise of soils within AB and it is usually great than 0.6 m (Liu et al., 2014). At the soil surface there is a device to measure the amount of precipitation and at the base of the instrument (depth B), a water collection device is used to measure the amount of water exiting the base downward. Surface runoff does not exist in the experimental area, thus is not a concern. Precipitation is monitored by rain gauge (Spectrum, USA, accuracy 0.2 mm), placed 1.5 m above ground surface. New lysimeter to measure the DSR (Cheng et al., 2017b). Such a new lysimeter has two parts: an upper water balance part and a lower measurement part. The advantage of this design is that when soil at point B in Figure 2 reaches saturation, the capillary water reaches point A. Therefore, when infiltrated water enters the water balance part at depth A, additional infiltrated water after satisfying the saturation of soil between A and B will go into the measuring part. The measurement part has a measurement accuracy of 0.2 mm (rain gauge, Spectrum, USA). The lysimeter is placed at 200 cm depth to measure DSR, meaning that any precipitation-induced infiltration passing the 200 cm depth will not be subject to evapotranspirative process anymore. In other words, the infiltrated water that can pass the 200 cm depth of soil will keep going down and may become groundwater recharge.

Before taking the measurements, the new lysimeter needs to be placed one year in advance, going through naturally settlement for a year, and allowing the soil to reach its pre-installation condition.

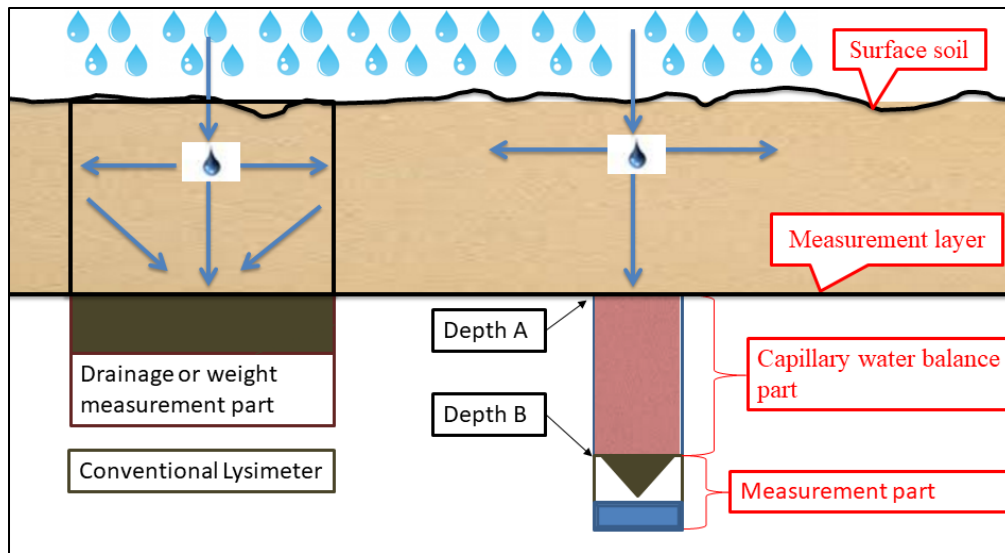

160 Figure 2. The schematic plot of a new lysimeter (on the right) with respect to the conventional lysimeter (on the  
left).

### 3 Results

The soil moisture variation of *Pinus sylvestris* var. *mongolica* in 2016 is shown in Figure 3. It reveals that soil moisture has obvious seasonal variational trends. The soil from January to March is frozen. The near surface soil moisture recharge is from snowmelt. When the near surface frozen soil starts to thaw, soil at the 20 cm depth is recharged on February 9<sup>th</sup>, 16<sup>th</sup> and 26<sup>th</sup> in 2016. Soil at depths greater than 20 cm remains relatively stable. Frequent precipitation events usually occur from June to November, during which soil moisture changes considerably, and soil moistures at different depths exhibit periodic increase or decrease, regulated by the interplay of precipitation and evapotranspiration. After February 26<sup>th</sup> in 2016, soil gradually thaws completely. Figure 3 shows that snowmelt can recharge the soil moisture as deep as 160 cm. The soil moisture at 200 cm depth is recharged for the first time after a heavy precipitation event on July 8<sup>th</sup> in 2016.

165

170

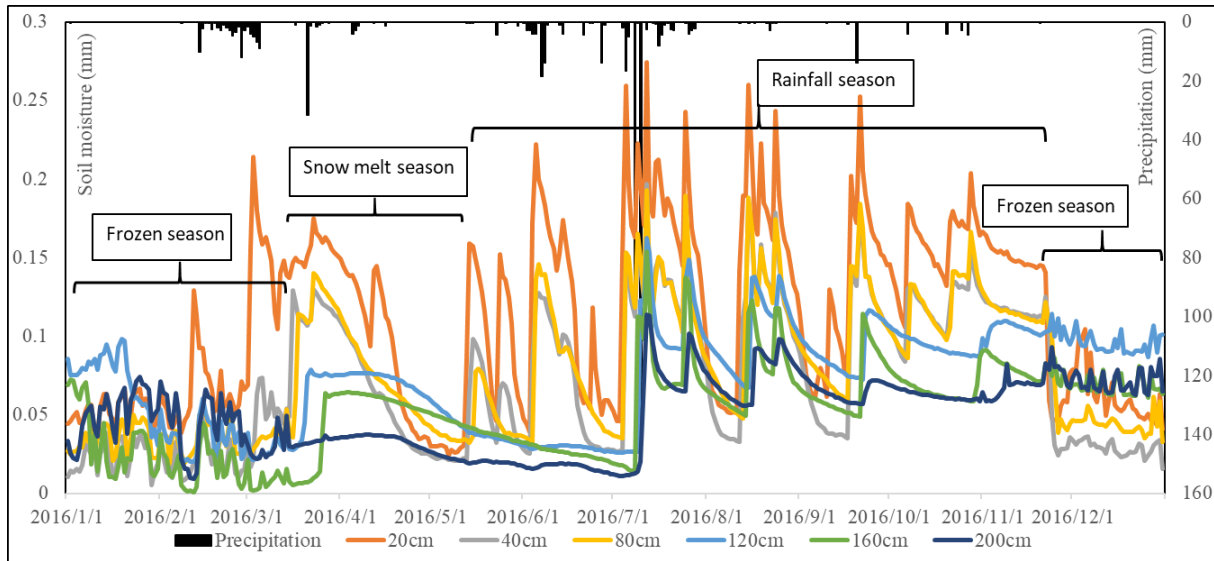

Figure 3. Annual precipitation and soil moisture of each layers in 2016.

175 According to Figure 3, the soil moisture content of the upper 200 cm soil layer fluctuates multiple times during the three-year experimental period. After November, the soil moisture content of the upper 200 cm soil layer fluctuates but DSR is not detected. This is probably due to the error of the EC-5 probe under frozen winter condition. Therefore, the active research period has been revised to from April to November each year.

180 In order to study the degree of soil moisture response to precipitation in individual layers, this research choose each layer's soil moisture at the beginning of each month of 2016 as a representative, to observe whether the soil moisture in a specific layer is recharged. Figure 4 shows the soil moistures at depths of 20 cm, 40 cm, 80 cm, 120 cm, 160 cm, and 200 cm at the beginning of each month. From Figure 3, the soil of *Pinus sylvestris* var. *mongolica* exhibits four distinctive layers: an evaporation layer at 0-40 cm depth, a lateral root activity layer at 40-160 cm depth, a dry soil layer at 160-200 cm depth, and a deep soil layer below 200 cm. For the 0-40 cm evaporation layer, the soil moisture increases only under the effect of precipitation or snowmelt. Its moisture content decreases rapidly under the interplay of evaporation and infiltration. For the 40-160 cm root activity layer, the soil moisture is recharged from infiltrated water passing through the upper layer, and it gradually decreases under the effects of infiltration and root moisture absorption. For the 160-200 cm dry soil, the infiltrated water hardly reaches this layer, and the soil layer with a soil moisture under the withered point is formed. The deep soil below 200 cm depth is of native sand soil, and Figure 3 shows that the soil moisture content of this layer is recharged five times under heavy precipitation events in 2016.

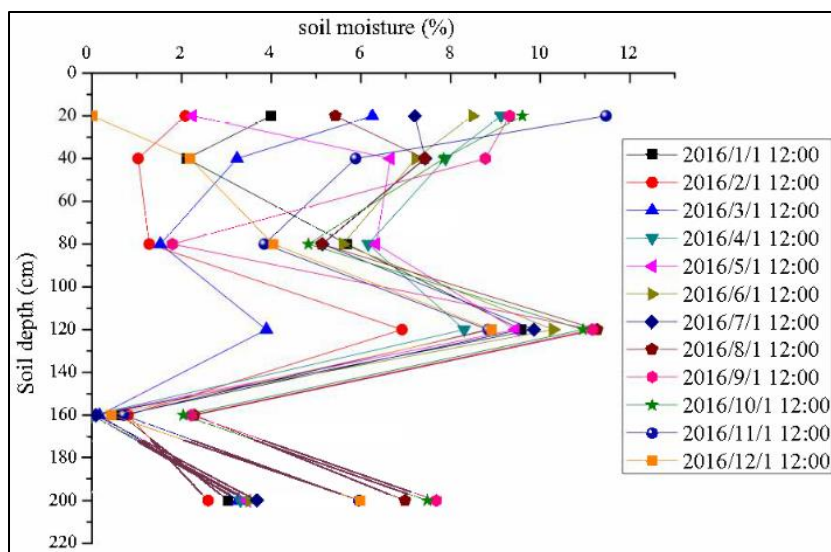

Figure 4. Month soil moisture changes of every soil layers, 2016.

190

195

200

205

The total precipitation in 2017 is 309 mm, which was a dry year. There are 32 times observed precipitation in the whole year as shown in Figure 5. The maximum precipitation intensity amount is 22 mm/d, in July 22, 2017. The soil moisture fluctuation in 2017 is similar to that in 2016. There is a freezing period from January-March, the surface soil freezes, and the soil water content changes in each soil layers are relatively stable. March to April belongs to the freezing and thawing mixed period, frozen water in the soil layer gradually melts, especially the surface layer frozen water functions as a reservoir. The frozen water replenishes the soil moisture of each soil layer, the spring snow melting recharge depth in 2017 is 140 cm. From April to November, it belongs to the soil water active period of the rainy season. Under the combined action of precipitation recharge, soil evapotranspiration and vegetation consumption, the soil moisture fluctuates rapidly; then the soil begins to freeze again in December. As shown in Figure 5, the soil moisture fluctuations intensely in the soil layers at 20 cm, 40 cm, and 80 cm depths. The soil layer from 120 cm to 200 cm is relatively stable, and it is only replenished by freeze-thaw soil moisture during the freezing and thawing period (March to April). The 120 cm and 160 cm depth soil layers are replenished with water during the continuous summer precipitation process (on 14 October), the 200 cm depth soil layer moisture has remained relatively dry throughout 2017. The annual DSR measured at the 200cm soil depth is only 0.2 mm, which is 1.2 mm lower than that of 2016. The lack of precipitation in 2017 causes a sharp drop in deep soil moisture infiltration.



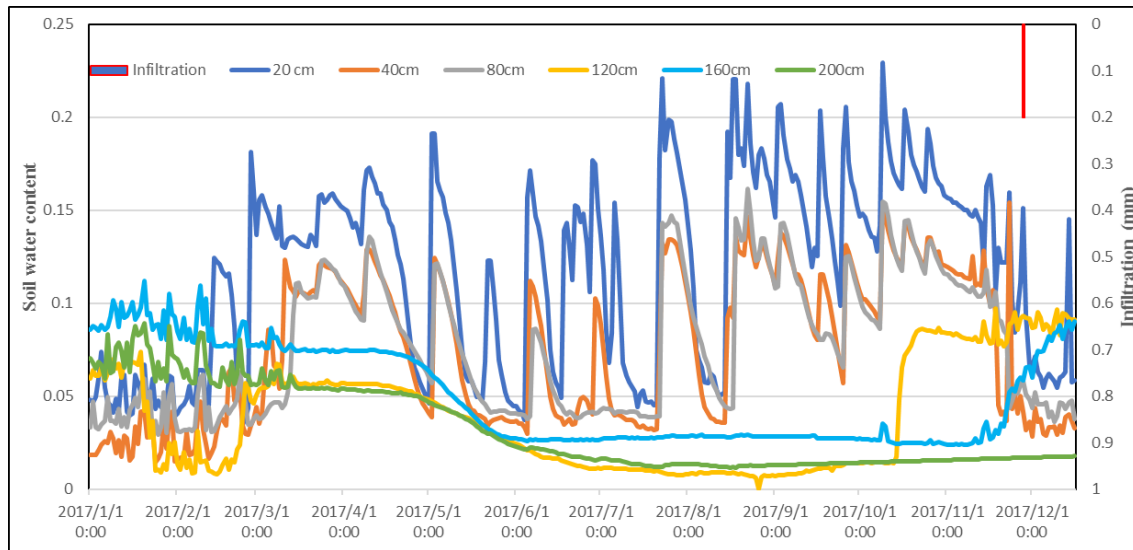

Figure 5 Soil moisture and DSR dynamic change in 2017

210 The total precipitation amount in 2018 is 472.2 mm, which is a wet year. There are 42 observed precipitation events throughout the year with a maximum precipitation intensity of 20 mm/d on 21 July, 2017. The soil moisture fluctuation in 2018 is similar to that in 2016 and 2017. There is a freezing period in January-March, in which the soil water content changes in each layer are relatively stable. The March and April belong to the freezing and thawing period, the frozen soil water gradually melts, and soil below the surface layer is replenished by the melted water, the spring snow melting recharge depth in 2018 is 160 cm. Consequently, the soil moistures in various layers rise accordingly. From April to 215 November, it belongs to the active season of the rainy season. Under the combined action of precipitation recharge, soil evapotranspiration and vegetation consumption, the soil moisture fluctuates. The shallow soil layer begins to freeze again in December.

220 As shown in Figure 6, the layers of strong soil moisture fluctuations are 20 cm, 40 cm, 80 cm, 120 cm, and 160 cm. The 200 cm level of soil changes relatively small, and was only recharged on May 14th to June 6<sup>th</sup> and September 7<sup>th</sup> of 2018. The annual soil moisture infiltration is only 1.2 mm in 2018, which is 1 mm higher than that in 2017 and 0.2 mm lower than that in 2016.

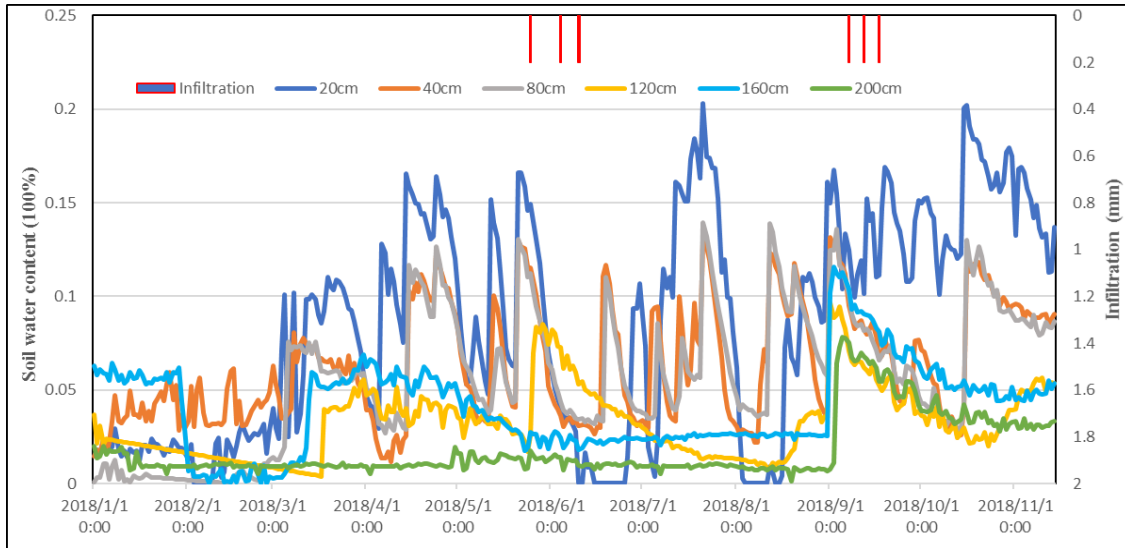

Figure 6. Soil moisture and DSR dynamic change in 2018.

### 3.1 Soil moisture infiltration rate comparison during different seasons

225 The soil moisture recharge sources in the experimental area are spring snowmelt and summer precipitation. According to Figure 3, we can clearly see that the soil water recharge in different seasons varies, especially at the end of winter season and in the summer rainy season. The amount of spring precipitation in this study site is small, and snowmelt moisture is the main water source in this semi-arid area. The germination process of vegetation or seeds in semi-arid areas mainly depends on the water source of accumulated snowfall in winter. With the surface soil  
 230 temperature increasing, the surface ice water gradually melts and infiltrates to deeper soil layer. As shown in Figure 7 (AB), this study chooses two typical processes for comparison: the snow melted soil moisture recharge process from February 26<sup>th</sup> to March 27<sup>th</sup> of 2016, and the precipitation recharge process from July 3<sup>rd</sup> to 12<sup>th</sup> of 2016. During the process of snowmelt infiltration, the soil wetting front moves slowly downward in the vertical direction, as shown in Figure 5A, it takes 2 days and 7 hours for the wetting point reaching the 60 cm soil layer, but for summer precipitation  
 235 infiltration process, it takes only 1 day for wetting front to reach 60 cm soil layer.

The February 26<sup>th</sup> to March 27<sup>th</sup> of 2016 snow melted soil moisture recharge process lasts for 29 days, and the soil moisture recharge depth reaches 160 cm. The soil moisture at 200 cm depth does not show any noticeable change, suggesting that DSR has not been generated. The start time of moisture recharge is set at when soil moisture content starts to increase. The end time of moisture recharge is set at when soil moisture content reaches its maximum. These  
 240 two moisture infiltration processes are shown in Figure 7. There are many factors affecting the rate of precipitation infiltration. A model that does not adequately consider the most relevant factors can certainly leads to erroneous simulation results. In the future, the gap between the experimental measurement results and the corresponding model simulation results much be investigated and eventually filled.

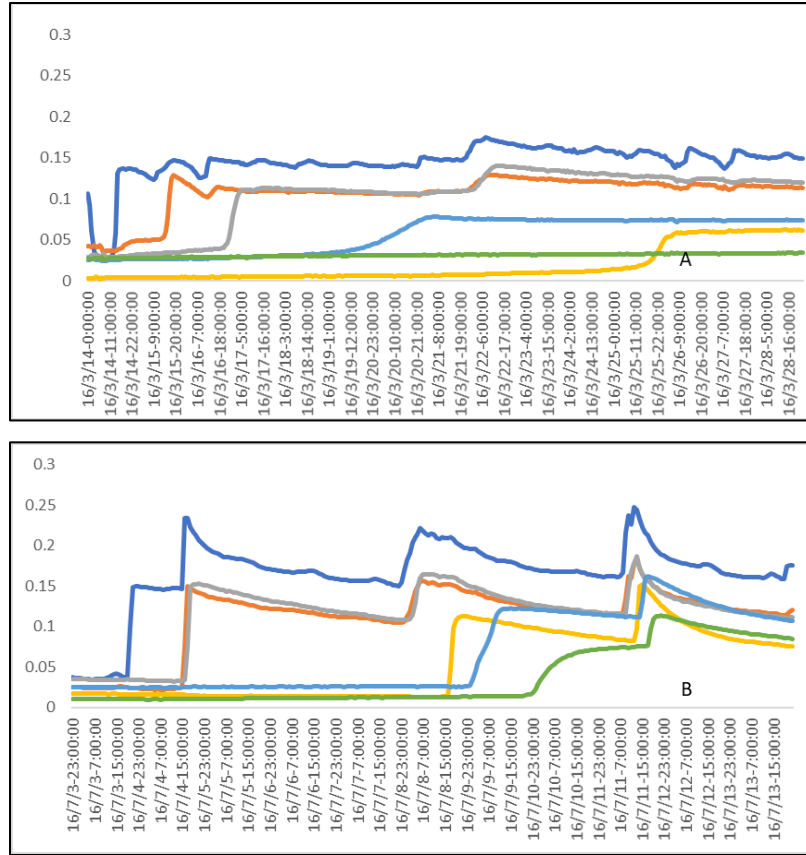

Figure 7. Two recharge process (snow melt process and precipitation process) in 2016.

### 3.2 Recharge intensity of different soil layer infiltration

In the laboratory, one may calculate the precipitation intensity infiltrating into a specific soil layer according to the soil characteristics with a proper mathematical model. In the natural environment, however, there are too many factors affecting the infiltration process, such as temperature and air humidity, wind speed, surface soil moisture, soil heterogeneity, etc. In this study, we computed the replenishment of each soil layer by analyzing the precipitation-induced wetting point to find out the minimum precipitation intensity for each individual layer.

Precipitation infiltration results in increasing soil moisture content. Each time when soil moisture infiltrates into a designated depth, it leaves a crest signal. Based on the comparison between the number of crest signals and the number of precipitations, the minimum precipitation amount can be determined by the crest signals at different soil depths. Antecedent soil moisture conditions also affect infiltration depth, shallow soil moisture in the semi-arid sandy land will soon return to a relatively dry state because of evapotranspiration. This research describes the general state of soil moisture fluctuations in the experimental area after precipitation. Statistics of precipitation data from 2016 to 2018 and fluctuations in soil moisture content in each layer are shown in Table 1, which shows that when precipitation infiltrates to soil layers at 20 cm, 40 cm, 80 cm, 120 cm, 160 cm, and 200 cm depths, the minimum precipitation intensities are 2.6 mm/d, 3.2 mm/d, 3.4 mm/d, 8.2 mm/d, 8.2 mm/d, and 13.2 mm/d, respectively. When heavy

precipitation events (precipitation intensity higher than 100 mm/d) happen in the study site, precipitation can recharge the soil moisture at 200 cm depth.

265

Table 1 Precipitation produced moisture increase signal and corresponding minimum precipitation intensity (data from 2016-2018).

| Soil layer depths | Sum of soil moisture increase signals on each soil layer | Corresponding minimum precipitation intensity |
|-------------------|----------------------------------------------------------|-----------------------------------------------|
| 20cm              | 74                                                       | 2.6mm/d                                       |
| 40cm              | 46                                                       | 3.2mm/d                                       |
| 80cm              | 32                                                       | 3.4mm/d                                       |
| 120cm             | 16                                                       | 8.2mm/d                                       |
| 160cm             | 16                                                       | 10.2mm/d                                      |
| 200cm             | 10                                                       | 13.2mm/d                                      |

### 3.3 Yearly moisture distribution of *Pinus sylvestris* var. *mongolica*

270

Figure 3 shows that during the seasonal frozen-soil period, soil moisture is relatively stable. The monthly average values for soil moistures of different soil layers in January and December of 2016 are used as the start and end soil moisture values. Although the precipitation amount varies from 2016 to 2018, other environmental factors in this area are basically the same, and soil moistures are similar. To figure out the *Pinus sylvestris* var. *mongolica* water balance from 2016 to 2018, one has:

$$P-DSR-ET=\delta W \quad (2)$$

275

where P is precipitation, ET is evapotranspiration, and  $\delta W$  is the whole 200 cm soil layer moisture change. Runoff is not included in above water balance equation because it does not occur during the experiment. As P, DSR, and  $\delta W$  can be accurately measured, ET can be calculated by above equation.

Table 2 Water distribution in 2016 of the rain-feed *Pinus sylvestris* var.

| Year | Precipitation | DSR   | $\delta W$ | ET        |
|------|---------------|-------|------------|-----------|
| 2016 | 466.4mm       | 1.4mm | 38.056mm   | 426.96mm  |
| 2017 | 309mm         | 0.4mm | -16mm      | 324.6mm   |
| 2018 | 472.2mm       | 1.2mm | 54.747mm   | 416.253mm |

As shown in Table 2, precipitation in the experimental area in 2016 is 466.4 mm and the DSR is 1.4 mm. Thanks to the heavy precipitation in the summer and the higher than multi-year average precipitation (multi-year average precipitation is 400 mm), all soil layer moisture content ( $\delta W$ ) increases 38.056 mm within the upper 200 mm depth.

280 The groundwater table is 8 m depth, beyond the root range of *Pinus sylvestris* var. *mongolica*. Therefore, *Pinus*  
*sylvestris* var. *mongolica* cannot absorb and utilize groundwater. Based on the real-time monitored precipitation, DSR  
and soil moisture content change, the evapotranspiration of *Pinus sylvestris* var. *mongolica* can be calculated as 426.96  
mm/year. 2017 is a dry year with a precipitation of 309 mm, DSR of 0.4 mm, soil water storage decreased by 16 mm,  
evapotranspiration amount is 324.6 mm. The precipitation amount in 2018 is 472.2 mm. The DSR is 1.2 mm, the soil  
285 water storage capacity is increased by 54.747 mm, and the evapotranspiration is 416.253 mm. Based on the  
redistribution data of precipitation in the shallow soil (200 cm depth) over the past three years, one can see that  
precipitation has a recharge effect on both shallow and deep soil layers. In the shallow soil layer, evapotranspiration  
in the dry year consumes stored water, but in the wet year precipitation water recharges the shallow soil layer. Deep  
soil layer infiltration has been recorded in the past three years with very small amount, indicating that under the  
290 existing vegetation cover and rain-fed conditions, the precipitation is barely able to support the shallow ecosystems,  
and only a small amount of precipitation can percolate into the deep soil layer.

Comparing the data of three years in Table 2, DSR of the experiment site is relatively small, indicating that the  
soil moisture resource in the *Pinus sylvestris* var. *mongolica* forest is limited under this rain-fed conditions. In the dry  
years, the soil evaporation was relative large, but the measured total evapotranspiration decreased, indicating that the  
295 transpiration of vegetation was inhibited. Under this condition, *Pinus sylvestris* var. cannot grow well. In semiarid  
regions, precipitation varies considerably every year, and the year of 2016 may not be representative of the long-term  
average behavior of DSR in this region as the precipitation of this year is higher than the average annual precipitation  
of 400 mm. Instead, it may be more representative of a wet year behavior, so as 2017 and 2018. To figure out the  
long-term behavior of DSR and SWC in the semiarid regions such as Mu Us Sandy land, one must carry out a multi-  
300 year (preferably a decade long) experiment.

#### 4 Discussion

In semi-arid areas, the main limiting factor for trees is available water resources (Gao et al., 2014b; Skarpe, 1991).  
Therefore, the key to understand the vegetation ecosystem in semi-arid areas is to study the supply of water resources  
(Cheng et al., 2018; Cheng et al., 2017a). The *Pinus sylvestris* var. *mongolica* has been in existence in the study area  
305 for more than 30 years, so the purpose of this study is to find out whether there is sufficient water resource available  
in the region to support vegetation ecosystem, through the measurement of deep soil water recharge (or DSR). The  
“sustainable” growth of plants in this study means that water resource from precipitation can meet the growth needs  
of *Pinus sylvestris* var. *mongolica*, and can still have an excess amount of water to replenish deep soil layer (to recharge  
the deep groundwater system beyond the root zones of plants). In this study, the soil moisture distribution of *Pinus*  
310 *sylvestris* var. *mongolica* was studied by using the new designed lysimeter to measure whether the soil layer below  
the root layer could produce DSR or not.

Lysimeter has been developed for hundreds of years and is widely used in the field of water balance research (Liu  
et al., 2002; López-Urrea et al., 2006; Boast and Robertson, 1982). The traditional Lysimeter has a size limitation, and

is ineffective in measuring trees and other large plants (Fritschen et al., 1977). This study used a newly designed  
315 Lysimeter to measure the deep soil moisture infiltration for water balance investigation (Cheng et al., 2017a).

Vegetation depends on precipitation, and roots are concentrated in shallow soil. Measuring the water absorption  
of roots, precipitation or interception of the canopy are complicated processes and often involves a great degree of  
uncertainty. This research, however, regards the canopy and topsoil as an integrated entity. And by measuring the  
amount of water entering the entity (precipitation) and the amount of water leaving the entity (deep soil recharge), one  
320 may conduct a water balance computation to calculate the amount of overall evapotranspiration.

This study monitored the distribution of soil moisture of *Pinus sylvestris* var. *mongolica* forest under the rain-fed  
conditions in the last three years, and verified whether soil moisture was sufficient (or sustainable) under existing  
precipitation conditions. One should be cautious that the three-year (2016-2018) soil moisture measurements presented  
in this study may not always be reliable for performing long term (such as decades long) prediction of whether the  
325 studied species can develop sustainably over decades as some artificial trees may have life cycles over decades long.  
Therefore, continuous (preferably decades long) measurements are necessary in the future. Another notable point is  
that the adaptability of long-lived woody species may not be based solely on water, temperature, light, and soil texture.  
Despite such limitations, this three-year investigation offers an important step for understanding the soil moisture  
dynamics of sand-fixing *Pinus sylvestris* var. *mongolica* forest in a semi-arid region. Furthermore, these three years  
330 (2016-2018)\_happen to encompass rather dramatically different weather patterns in the region (wet versus dry years),  
thus offer additional insights on the function of the *Pinus sylvestris* var. *mongolica* forest under highly variable  
external forces.

## 5 Conclusions

Precipitation is almost the only water sources for replenishing the groundwater system in the Mu Us Sandy land,  
335 construction of a vast artificial shelter forest may have detrimental effect on ecological environment in arid regions  
and may substantially change the evapotranspiration pattern in the region and will greatly affect the groundwater  
recharge in the region, which directly determines if the water resource for reforestation. This study uses a 30-years-  
old mature *Pinus sylvestris* var. *mongolica* forest of a 10-meter line spacing as the target of the experiment. Using a  
new lysimeter to monitor DSR and to accurately calculate water balance from 2016 to 2018. The following conclusions  
340 can be drawn from this study:

1. *Pinus sylvestris* var. *mongolica* forest soil in high latitude region, as Mu Us Sandy land has two significant  
moisture recharge processes in an annual base: spring snow melted moisture infiltration-recharge process and  
summer precipitation-recharge process. The recharge depth of spring snow melted moisture recharge process can  
reach 160 cm of depth. The summer precipitation-recharge process results in DSR, recharging the soil moisture  
345 below 200 cm. The DSR of 2016-2018 is 1.4 mm, 0.2 mm, 1.2 mm, respectively. Under the existing precipitation  
conditions, water supply in the rain-fed pine forest can meet the consumption of vegetations but the remaining  
amount of rain-fed infiltration that can percolate into deep soil layer is small.

2. The experimental results show that the precipitation intensities are respectively 2.6 mm/d, 3.2 mm/d, 3.4 mm/d, 8.2 mm/d, 8.2 mm/d, and 13.2 mm/d when precipitation infiltrates into 20 cm, 40 cm, 80 cm, 120 cm, 160 cm, and 200 cm soil depths. Infiltration depth and precipitation intensity are not linearly related.
3. In semi-arid areas, the annual precipitation varies greatly, the dry and wet years alternate, DSR mount is relatively small, soil water mount is limited. The growth of *Pinus* is affected by annual precipitation. In 2016-2018, compared to the start of each year, soil moisture content increases 38.056 mm, -16 mm, 54.747 mm, and the negative value of year 2017 means that the soil moisture storage decreased by 16 mm.
4. The precipitations in 2016-2018 are 466.4 mm, 309 mm, 472.2 mm, and the associated DSR values are 1.4 mm, 0.2 mm, 1.2 mm, respectively. Under the current precipitation condition and reforestation design, the natural recharging moisture of *Pinus sylvestris* var. *mongolica* can meet the plant growth needs, and have additional moisture for DSR which may eventually recharge groundwater.
5. Calculation based on these dataset shows that the annual evaporation of *Pinus sylvestris* var. *mongolica* forest in Mu Us sandy land is 426.96 mm, 324.6 mm, 416.253 mm for year 2016-2018, respectively. *Pinus* automatically adjusts its evapotranspiration in response to different precipitation amount, and this may affect the development of *Pinus sylvestris* var. As extreme weather conditions happen more frequently worldwide (possibly due to the global warming effect), the arid region precipitation may change rapidly. Whether *Pinus sylvestris* var. *mongolica* can adapt to this trend is a question that still needs decades-long observational effort.

### 365 Acknowledgements:

This study was supported with research grants from the Fundamental Research Funds for the Central Universities (BLX201814) and the National Natural Science Foundation of China (41771306). I especially thanks Chinese Scholar Council support me to go to Texas A&M University as a visiting researcher. We sincerely thank two anonymous reviewers and Editor for their constructive and critical comments which help us improve the quality of the manuscript.

### 370 References

- Bao, G.: Mongolian pines (*Pinus sylvestris* var. *mongolica*) in the Hulun Buir steppe, China, respond to climate in adjustment to the local water supply, *International Journal of Biometeorology*, 59, 1-10, 10.1007/s00484-013-0767-3, 2015.
- Barton, L., Kiese, R., Gatter, D., Butterbach-Bahl, K., Buck, R., Hinz, C., and Murphy, D. V.: Nitrous oxide emissions from a cropped soil in a semi-arid climate, *Global Change Biology*, 14, 177-192, 10.1111/j.1365-2486.2007.01474.x, 2008.
- Bawa, K. S., Koh, L. P., Lee, T. M., Liu, J., Ramakrishnan, P., Douglas, W. Y., Zhang, Y.-p., and Raven, P. H.: China, India, and the environment, *Science*, 327, 1457-1459, 2010. DOI: 10.1126/science.1185164.
- Boast, C., and Robertson, T.: A "Micro-Lysimeter" Method for Determining Evaporation from Bare Soil: Description and Laboratory Evaluation I, *Soil Science Society of America Journal*, 46, 689-696, 1982. doi:10.2136/sssaj1982.03615995004600040005x.
- Bouma, J., and Dekker, L. W.: A case study on infiltration into dry clay soil I. Morphological observations, *Geoderma*, 20, 27-40, 1978. [Doi.org/10.1016/0016-7061\(78\)90047-2](https://doi.org/10.1016/0016-7061(78)90047-2).
- Bouwman, A., Van der Hoek, K., Eickhout, B., and Soenario, I.: Exploring changes in world ruminant production systems, *Agricultural Systems*, 84, 121-153, 2005. [Doi.org/10.1016/j.agsy.2004.05.006](https://doi.org/10.1016/j.agsy.2004.05.006)

- Burgess, S. S., Adams, M. A., Turner, N. C., and Ong, C. K.: The redistribution of soil water by tree root systems, *Oecologia*, 115, 306-311, 1998. [Doi.org/10.1007/s004420050521](https://doi.org/10.1007/s004420050521)
- Cao, S., Chen, L., Shankman, D., Wang, C., Wang, X., and Zhang, H.: Excessive reliance on afforestation in China's arid and semi-arid regions: lessons in ecological restoration, *Earth-Science Reviews*, 104, 240-245, 2011. [doi.org/10.1016/j.earscirev.2010.11.002](https://doi.org/10.1016/j.earscirev.2010.11.002)
- 390 Cheng, Y., Zhan, H., Yang, W., Dang, H., and Li, W.: Is annual recharge coefficient a valid concept in arid and semi-arid regions?, *Hydrol. Earth Syst. Sci.*, 21, 5031-5042, 10.5194/hess-21-5031-2017, 2017b.
- Cheng, Y., Li, Y., Zhan, H., Liang, H., Yang, W., Zhao, Y., and Li, T.: New comparative experiments of different soil types for farmland water conservation in arid regions, *Water*, 10, 298, 2018. [doi.org/10.3390/w10030298](https://doi.org/10.3390/w10030298)
- 395 Contreras, S., Jobbágy, E. G., Villagra, P. E., Nosoletto, M. D., and Puigdefábregas, J.: Remote sensing estimates of supplementary water consumption by arid ecosystems of central Argentina, *Journal of Hydrology*, 397, 10-22, <https://doi.org/10.1016/j.jhydrol.2010.11.014>, 2011.
- Fagg, C. W., and Stewart, J. L.: The value of *Acacia* and *Prosopis* in arid and semi-arid environments, *Journal of Arid Environments*, 27, 3-25, <https://doi.org/10.1006/jare.1994.1041>, 1994.
- 400 Fritschen, L. J., Hsia, J., and Doraiswamy, P.: Evapotranspiration of a Douglas fir determined with a weighing lysimeter, *Water Resources Research*, 13, 145-148, 1977. <https://doi.org/10.1029/WR013i001p00145>
- Gao, Y., Zhu, X., Yu, G., He, N., Wang, Q., and Tian, J.: Water use efficiency threshold for terrestrial ecosystem carbon sequestration in China under afforestation, *Agricultural and Forest Meteorology*, 195-196, 32-37, <https://doi.org/10.1016/j.agrformet.2014.04.010>, 2014a.
- 405 Gao, Y., Zhu, X., Yu, G., He, N., Wang, Q., and Tian, J.: Water use efficiency threshold for terrestrial ecosystem carbon sequestration in China under afforestation, *Agricultural and Forest Meteorology*, 195, 32-37, 2014b. [doi.org/10.1016/j.agrformet.2014.04.010](https://doi.org/10.1016/j.agrformet.2014.04.010)
- García Chevesich, P., Neary, D. G., Scott, D. F., Benyon, R. G., and Reyna, T.: Forest management and the impact on water resources: a review of 13 countries, UNESCO Publishing, 2017.
- 410 Gerten, D., Schaphoff, S., Haberlandt, U., Lucht, W., and Sitch, S.: Terrestrial vegetation and water balance—hydrological evaluation of a dynamic global vegetation model, *Journal of Hydrology*, 286, 249-270, <https://doi.org/10.1016/j.jhydrol.2003.09.029>, 2004.
- Gong, D.-Y., Shi, P.-J., and Wang, J.-A.: Daily precipitation changes in the semi-arid region over northern China, *Journal of Arid Environments*, 59, 771-784, <https://doi.org/10.1016/j.jaridenv.2004.02.006>, 2004.
- 415 Hu, Y. L., Zeng, D. H., Fan, Z. P., Chen, G. S., Zhao, Q., and Pepper, D.: Changes in ecosystem carbon stocks following grassland afforestation of semiarid sandy soil in the southeastern Keerqin Sandy Lands, China, *Journal of Arid Environments*, 72, 2193-2200, <https://doi.org/10.1016/j.jaridenv.2008.07.007>, 2008.
- Kraemer, R., Prishchepov, A. V., Müller, D., Kuemmerle, T., Radeloff, V. C., Dara, A., Terekhov, A., and Frühauf, M.: Long-term agricultural land-cover change and potential for cropland expansion in the former Virgin Lands area of Kazakhstan, *Environmental Research Letters*, 10, 054012, 2015. [doi.org/10.1088/1748-9326/10/5/054012](https://doi.org/10.1088/1748-9326/10/5/054012)
- 420 Li, W., Yan, M., Qingfeng, Z., and Xingchang, Z.: Groundwater use by plants in a semi-arid coal-mining area at the Mu Us Desert frontier, *Environmental Earth Sciences*, 69, 1015-1024, 10.1007/s12665-012-2023-2, 2013a.
- Li, X.R., Xiao, H.L., Zhang, J.G., and Wang, X.P.: Long-Term Ecosystem Effects of Sand-Binding Vegetation in the Tengger Desert, Northern China, *Restoration Ecology*, 12, 376-390, 10.1111/j.1061-2971.2004.00313.x, 2004.
- 425 Li, X., Zhang, Z., Huang, L., and Wang, X.: Review of the ecohydrological processes and feedback mechanisms controlling sand-binding vegetation systems in sandy desert regions of China, *Chinese Science Bulletin*, 58, 1483-1496, 10.1007/s11434-012-5662-5, 2013b.
- 430 Liu, C., Zhang, X., and Zhang, Y.: Determination of daily evaporation and evapotranspiration of winter wheat and maize by large-scale weighing lysimeter and micro-lysimeter, *Agricultural and Forest Meteorology*, 111, 109-120, 2002. [doi.org/10.1016/S0168-1923\(02\)00015-1](https://doi.org/10.1016/S0168-1923(02)00015-1)
- Liu, Q., Yasufuku, N., Miao, J., and Ren, J.: An approach for quick estimation of maximum height of capillary rise, *Soils and Foundations*, 54, 1241-1245, 2014. [doi.org/10.1016/j.sandf.2014.11.017](https://doi.org/10.1016/j.sandf.2014.11.017)
- 435 López-Urrea, R., de Santa Olalla, F. M., Fabeiro, C., and Moratalla, A.: Testing evapotranspiration equations using lysimeter observations in a semiarid climate, *Agricultural water management*, 85, 15-26, 2006. <https://doi.org/10.1016/j.agwat.2006.03.014>
- Menon, S., Hansen, J., Nazarenko, L., and Luo, Y.: Climate effects of black carbon aerosols in China and India, *Science*, 297, 2250-2253, 2002. DOI: 10.1126/science.1075159
- 440 Ngigi, S. N., Savenije, H. H. G., Rockström, J., and Gachene, C. K.: Hydro-economic evaluation of rainwater harvesting and management technologies: Farmers' investment options and risks in semi-arid Laikipia district



- of Kenya, *Physics and Chemistry of the Earth, Parts A/B/C*, 30, 772-782, <https://doi.org/10.1016/j.pce.2005.08.020>, 2005.
- 445 Powell, J. W., Gilbert, G. K., Dutton, C. E., Drummond, W., and Thompson, A. H.: Report on the Lands of the Arid Region of the United States: With a More Detailed Account of the Lands of Utah. With Maps, Governmentprint. Office, 1879.
- Reynolds, J. F., Smith, D. M. S., Lambin, E. F., Turner, B., Mortimore, M., Batterbury, S. P., Downing, T. E., Dowlatabadi, H., Fernández, R. J., and Herrick, J. E.: Global desertification: building a science for dryland development, *science*, 316, 847-851, 2007. DOI: 10.1126/science.1131634
- 450 Rhee, J., Im, J., and Carbone, G. J.: Monitoring agricultural drought for arid and humid regions using multi-sensor remote sensing data, *Remote Sensing of Environment*, 114, 2875-2887, <https://doi.org/10.1016/j.rse.2010.07.005>, 2010.
- Roth, B. E., Slatton, K. C., and Cohen, M. J.: On the potential for high-resolution lidar to improve rainfall interception estimates in forest ecosystems, *Frontiers in Ecology and the Environment*, 5, 421-428, 10.1890/060119.1, 2007.
- 455 Runnström, M. C.: Is Northern China Winning the Battle against Desertification?, *AMBIO: A Journal of the Human Environment*, 29, 468-476, 10.1579/0044-7447-29.8.468, 2000.
- Runnström, M. C.: Rangeland development of the Mu Us Sandy Land in semiarid China: an analysis using Landsat and NOAA remote sensing data, *Land Degradation & Development*, 14, 189-202, 10.1002/ldr.545, 2003.
- 460 Sharma, P., and Sharma, P.: *Ecology and environment*, Rastogi Publications, 2005.
- Skarpe, C.: Spatial patterns and dynamics of woody vegetation in an arid savanna, *Journal of Vegetation Science*, 2, 565-572, 1991.
- Su, Y. Z., Zhao, W. Z., Su, P. X., Zhang, Z. H., Wang, T., and Ram, R.: Ecological effects of desertification control and desertified land reclamation in an oasis-desert ecotone in an arid region: A case study in Hexi Corridor, northwest China, *Ecological Engineering*, 29, 117-124, <https://doi.org/10.1016/j.ecoleng.2005.10.015>, 2007.
- 465 Sun, W., Song, X., Mu, X., Gao, P., Wang, F., and Zhao, G.: Spatiotemporal vegetation cover variations associated with climate change and ecological restoration in the Loess Plateau, *Agricultural and Forest Meteorology*, 209, 87-99, 2015. <https://doi.org/10.1016/j.agrformet.2015.05.002>
- Wang, F., Pan, X., Wang, D., Shen, C., and Lu, Q.: Combating desertification in China: past, present and future, *Land Use Policy*, 31, 311-313, 2013. [doi.org/10.1016/j.landusepol.2012.07.010](https://doi.org/10.1016/j.landusepol.2012.07.010)
- 470 Wang, X., Zhang, C., Hasi, E., and Dong, Z.: Has the Three Norths Forest Shelterbelt Program solved the desertification and dust storm problems in arid and semiarid China?, *Journal of Arid Environments*, 74, 13-22, 2010a. [doi.org/10.1016/j.jaridenv.2009.08.001](https://doi.org/10.1016/j.jaridenv.2009.08.001)
- Wang, X. M., Zhang, C. X., Hasi, E., and Dong, Z. B.: Has the Three Norths Forest Shelterbelt Program solved the desertification and dust storm problems in arid and semiarid China?, *Journal of Arid Environments*, 74, 13-22, <https://doi.org/10.1016/j.jaridenv.2009.08.001>, 2010b.
- 475 Wu, B., Han, H., He, J., Zhang, J., Cui, L., Jia, Z., and Yang, W.: Field-Specific Calibration and Evaluation of ECH2O EC-5 Sensor for Sandy Soils, *Soil Science Society of America Journal*, 78, 70-78, 2014. doi:10.2136/sssaj2013.05.0209
- 480 Wu, Z., Wu, J., Liu, J., He, B., Lei, T., and Wang, Q.: Increasing terrestrial vegetation activity of ecological restoration program in the Beijing-Tianjin Sand Source Region of China, *Ecological Engineering*, 52, 37-50, 2013.
- Yang, X., Zhang, K., Jia, B., and Ci, L.: Desertification assessment in China: An overview, *Journal of Arid Environments*, 63, 517-531, 2005. [doi.org/10.1016/j.jaridenv.2005.03.032](https://doi.org/10.1016/j.jaridenv.2005.03.032)
- 485 Young, A.: *Agroforestry for soil conservation*, 04; S599. 9. T76, Y68., CAB international Wallingford, UK, 1989.
- Zhu, J., Kang, H., Tan, H., and Xu, M.: Effects of drought stresses induced by polyethylene glycol on germination of *Pinus sylvestris* var. *mongolica* seeds from natural and plantation forests on sandy land, *Journal of Forest Research*, 11, 319-328, 10.1007/s10310-006-0214-y, 2006.
